# Supplementary material
Source: PubMed Central journal article supplement (PMC4046726)
Supplement: CJN.08640813_CJN08640813SupplementaryData.pdf [file CJN.08640813_CJN08640813SupplementaryData.pdf]

**Supplementary Appendix:**

**Rising B-type Natriuretic Peptide in chronic kidney disease III-IV, dialysis and kidney transplant patients differs between groups and predicts mortality**

**Table S1.** Variables with a significant association with log-transformed NT-BNP-76 in all patients together, that differed between groups in **Table 1** (CKD, dialysis and KTR).

| <b>Variable</b>                               | <b>Beta-coefficient (95% confidence interval)</b> | <b>P</b> |
|-----------------------------------------------|---------------------------------------------------|----------|
| <b>Age (per year)</b>                         | 0.05 (0.03 to 0.06)                               | <0.001   |
| <b>Hemoglobin (per 10g/dL)</b>                | -0.05 (-0.06 to -0.04)                            | <0.001   |
| <b>C Reactive Protein (per log unit)</b>      | 0.55 (0.41 to 0.68)                               | <0.001   |
| <b>Albumin (per g/L)</b>                      | -0.26 (-0.30 to -0.22)                            | <0.001   |
| <b>Systolic blood pressure (per mmHg)</b>     | 0.04 (0.03 – 0.04)                                | <0.001   |
| <b>Body Mass Index (per kg/m<sup>2</sup>)</b> | -0.10 (-0.13 to – 0.06)                           | <0.001   |
| <b>Diabetes</b>                               | 0.15 (-0.33 to 0.63)                              | 0.53     |
| <b>Cardiovascular Disease</b>                 | 1.38 (0.95 to 1.92)                               | <0.001   |
| <b>Sex (male)</b>                             | -0.57 (-0.99 to -0.16)                            | 0.007    |
| <b>Troponin T<math>\geq</math>0.04ng/mL</b>   | 2.4 (2.0-2.8)                                     | <0.001   |
| <b>Renin-angiotensin system inhibition</b>    | -0.77 (-1.17 to -0.38)                            | <0.001   |
| <b>Antiplatelet agent</b>                     | 1.0 (0.6 to 1.4)                                  | <0.001   |

**Table S2.** Variables with a significant association with log-transformed BNP-32 in all patients together, that differed between groups in **Table 1** (CKD, dialysis and KTR).

| <b>Variable</b>                              | <b>Beta-coefficient (95% confidence interval)</b> | <b>P</b> |
|----------------------------------------------|---------------------------------------------------|----------|
| <b>Age (per year)</b>                        | 0.04 (0.03 to 0.05)                               | <0.001   |
| <b>Hemoglobin (per 10g/dL)</b>               | -0.03 (-0.04 to -0.02)                            | <0.001   |
| <b>C Reactive Protein (per log unit)</b>     | 0.27 (0.18 to 0.35)                               | <0.001   |
| <b>Albumin (per 10g/dL)</b>                  | -0.15 (-0.17 to -0.12)                            | <0.001   |
| <b>Systolic blood pressure (per mmHg)</b>    | 0.02 (0.01 – 0.03)                                | <0.001   |
| <b>Body Mass Index (per g/m<sup>2</sup>)</b> | -0.05 (-0.8 to – 0.03)                            | <0.001   |
| <b>Diabetes</b>                              | 0.39 (0.10 to 0.67)                               | 0.007    |
| <b>Cardiovascular Disease</b>                | 1.04 (0.78 to 1.29)                               | <0.001   |
| <b>Sex (male)</b>                            | -0.40 (-0.65 to -0.15)                            | 0.002    |
| <b>Troponin T<math>\geq</math>0.04ng/mL</b>  | 1.27 (1.02 to 1.51)                               | <0.001   |
| <b>Renin-angiotensin system inhibition</b>   | -0.32 (-0.56 to -0.08)                            | <0.001   |
| <b>Beta-blocker</b>                          | 0.39 (0.15 to 0.63)                               | 0.002    |
| <b>Antiplatelet agent</b>                    | 0.76 (0.51 to 1.00)                               | <0.001   |

**Table S3.** Values for tertiles of change in BNP. The “+” or “-“ sign indicates direction of change.

|                  | <b>Tertile 1</b> | <b>Tertile 2</b>                | <b>Tertile 3</b> |
|------------------|------------------|---------------------------------|------------------|
| <b>NT-BNP-76</b> |                  |                                 |                  |
| CKD III-IV       | ≤ +144pg/mL      | +145pg/mL to<br>+3,065pg/mL     | ≥ +3,066pg/mL    |
| Dialysis         | ≤ +3,566pg/mL    | + 3,567pg/mL to<br>+27,448pg/mL | ≥ +27,449pg/mL   |
| KTR              | ≤ -46pg/mL       | -45pg/mL to<br>+57pg/mL         | ≥ +58pg/mL       |
| <b>BNP-32</b>    |                  |                                 |                  |
| CKD III-IV       | ≤ -35pg/mL       | -34pg/mL to<br>+15pg/mL         | ≥ +16pg/mL       |
| Dialysis         | ≤ -21pg/mL       | -20pg/mL to<br>+132pg/mL        | ≥ +133pg/mL      |
| KTR              | ≤ -11pg/mL       | -10pg/mL to<br>+10pg/mL         | ≥ +11pg/mL       |
